# Supplementary material
Source: ML conference proceedings conference paper supplement (https://openreview.net/forum?id=8ygF02Zm51q)
Supplement: supplementary_material [file attachment]

# Contents

|          |                                                                                  |           |
|----------|----------------------------------------------------------------------------------|-----------|
| <b>1</b> | <b>Introduction</b>                                                              | <b>1</b>  |
| <b>2</b> | <b>Background and Motivation</b>                                                 | <b>2</b>  |
| 2.1      | Two families of compression operators . . . . .                                  | 2         |
| 2.2      | Error feedback: what it is good for, and what we still do not know . . . . .     | 3         |
| <b>3</b> | <b>Summary of contributions</b>                                                  | <b>4</b>  |
| <b>4</b> | <b>Main Results</b>                                                              | <b>6</b>  |
| 4.1      | Markov compressors . . . . .                                                     | 6         |
| 4.2      | Compressed gradient descent using the Markov compressor . . . . .                | 7         |
| 4.3      | Distributed variant of EF21 . . . . .                                            | 8         |
| 4.4      | Relationship between EF and EF21 . . . . .                                       | 8         |
| 4.5      | Theory . . . . .                                                                 | 8         |
| 4.6      | EF21+: Use $\mathcal{C}$ or the Markov compressor, whichever is better . . . . . | 9         |
| 4.7      | Dealing with stochastic gradients . . . . .                                      | 9         |
| <b>5</b> | <b>Experiments</b>                                                               | <b>9</b>  |
| <b>A</b> | <b>Extra Experiments</b>                                                         | <b>15</b> |
| A.1      | Experiments with nonconvex logistic regression . . . . .                         | 15        |
| A.1.1    | Experiment 1: Stepsize tolerance (extension) . . . . .                           | 15        |
| A.1.2    | Experiment 2: Fine-tuning $k$ and the stepsizes (extension) . . . . .            | 19        |
| A.2      | Experiments with least squares . . . . .                                         | 20        |
| A.2.1    | Experiment 1: Stepsize tolerance . . . . .                                       | 20        |
| A.3      | Deep learning experiments . . . . .                                              | 25        |
| A.3.1    | Tuned stepsizes . . . . .                                                        | 25        |
| A.3.2    | Dependence on $k$ . . . . .                                                      | 25        |
| <b>B</b> | <b>Proofs for Section 4.1: Distortion of Markov Compressor</b>                   | <b>26</b> |
| <b>C</b> | <b>Proofs for Section 4.4: Theorem 1</b>                                         | <b>27</b> |
| C.1      | The original error feedback method . . . . .                                     | 27        |
| C.2      | The proof of Theorem 1 . . . . .                                                 | 28        |
| <b>D</b> | <b>Four Lemmas Needed in the Proofs of Theorems 2 and 3</b>                      | <b>28</b> |
| D.1      | Compression distortion bound . . . . .                                           | 28        |
| D.2      | Optimal choice of $s$ in Lemma 2 . . . . .                                       | 29        |
| D.3      | A descent lemma . . . . .                                                        | 30        |
| D.4      | Stepsize selection . . . . .                                                     | 30        |

|          |                                                                                               |           |
|----------|-----------------------------------------------------------------------------------------------|-----------|
| <b>E</b> | <b>Proof of Theorem 2</b>                                                                     | <b>31</b> |
| <b>F</b> | <b>Proof of Theorem 3</b>                                                                     | <b>32</b> |
| <b>G</b> | <b>EF21+: The Algorithm and its Analysis</b>                                                  | <b>32</b> |
|          | G.1 The EF21+ Algorithm . . . . .                                                             | 32        |
|          | G.2 Analysis of EF21+ . . . . .                                                               | 32        |
| <b>H</b> | <b>Dealing with Stochastic Gradients (Details for Section 4.7)</b>                            | <b>33</b> |
| <b>I</b> | <b>Computation of <math>\sqrt{\frac{\beta(s^*)}{\theta(s^*)}}</math> for some Compressors</b> | <b>35</b> |
|          | I.1 From unbiased to biased compressors . . . . .                                             | 35        |
|          | I.2 Top- $k$ and a scaled version of Rand- $k$ . . . . .                                      | 35        |

# Appendix

## A Extra Experiments

We now present several additional experiments. First, in Section A.1 we comment on experiments with nonconvex logistic regression (see (19)), in Section A.2 we perform experiments on least-squares problem (as an example of a function that is not strongly convex but satisfies the PL inequality), and finally, in Section A.3 we conduct several deep learning experiments. The code is available at [github.com/IgorSokoloff/ef21\\_experiments\\_source\\_code](https://github.com/IgorSokoloff/ef21_experiments_source_code).

### A.1 Experiments with nonconvex logistic regression

#### A.1.1 Experiment 1: Step size tolerance (extension)

This sequence of experiments extends the results presented in the corresponding paragraph of Section 5. For each dataset, we select the parameter  $k$  (varied by rows) within the powers of 2. For each plot, we vary the step size within the powers of 2 starting from the largest theoretically accepted  $\gamma$ .

For example, for  $k = 2$  and EF21+ with `mushrooms` dataset we consider factors from the set

$$\{1, 2, 4, 8, 16, 32, 64, 128, 256, 512, 1024, 2048\}$$

and select the step size as a multiple of the upper bound stated in Theorem 2.

Red diamond markers indicate the iterations at which EF21+ method uses mostly DCGD steps. Precisely, the red diamond marker appears on the plot if the distortion  $\|\mathcal{C}(s) - s\|$  is smaller than  $\|\mathcal{M}(s) - s\|$  for at least half of the workers, where  $s = \nabla f_i(x^{t+1})$ . For more details, see figures below, where parameter  $k$  is fixed within each row and each column corresponds to a particular method.

All of the figures above illustrate that EF21 and EF21+ tolerates much larger stepsizes, which makes them more efficient in practice. Moreover, in all experiments with large stepsizes ( $16\times$ – $128\times$ ), EF starts oscillating, which hinders the convergence to the desired tolerance

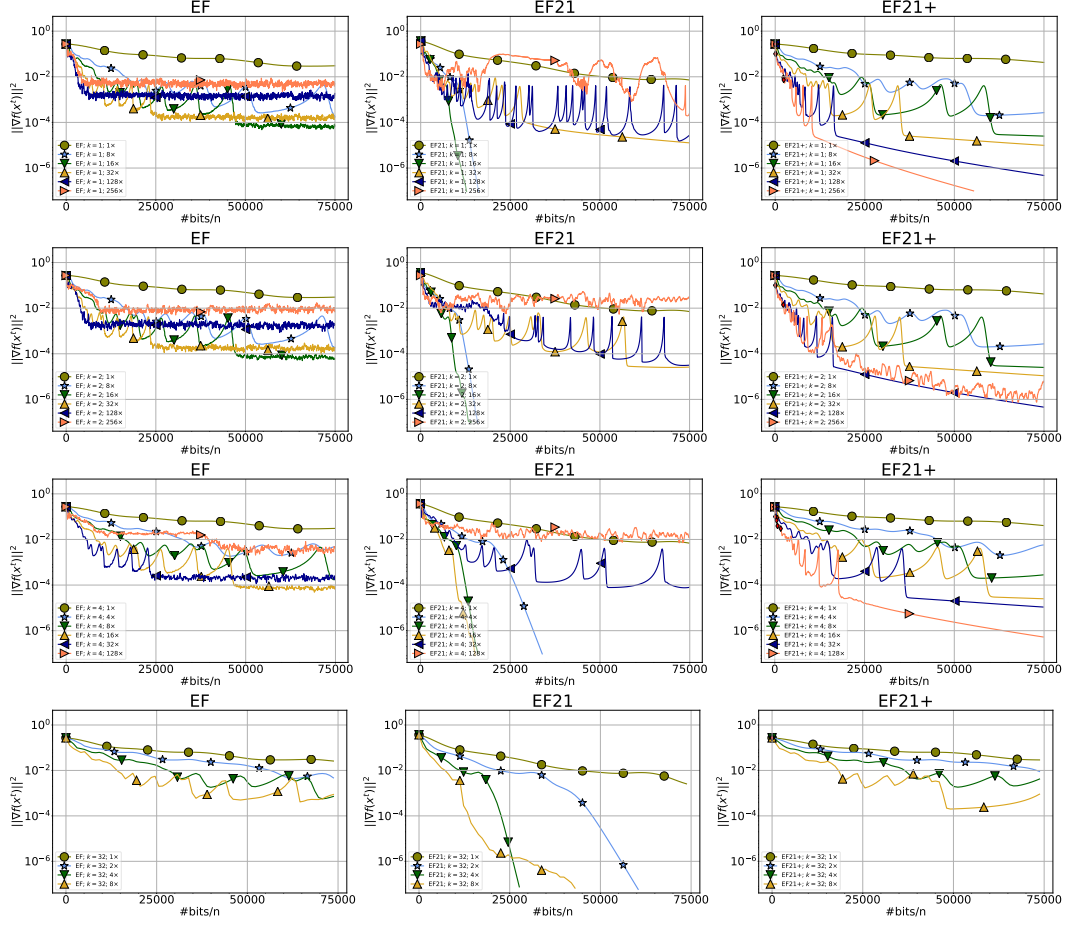

Figure 3: The performance of EF, EF21, and EF21+ with Top- $k$  compressor, and for increasing step-sizes. Each row corresponds to a different value of  $k \in \{1, 2, 4, 32\}$ . The dataset used: phishing. By  $1\times$ ,  $2\times$ ,  $4\times$  (and so on) we indicate that the stepsize was set to a multiple of the largest stepsize predicted by our theory.

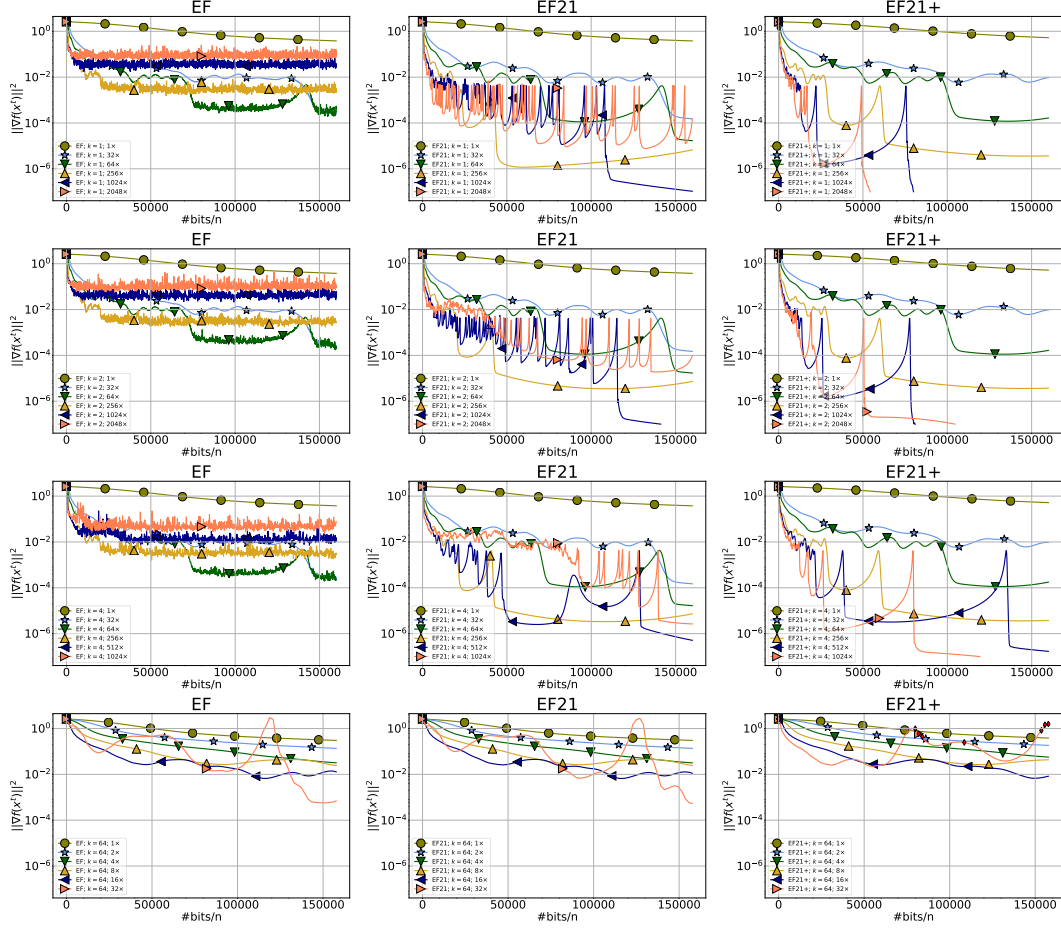

Figure 4: The performance of EF, EF21, and EF21+ with Top- $k$  compressor, and for increasing step-sizes. Each row corresponds to a different value of  $k \in \{1, 2, 4, 64\}$ . The dataset used: mushrooms. By  $1\times, 2\times, 4\times$  (and so on) we indicate that the stepsize was set to a multiple of the largest stepsize predicted by our theory.

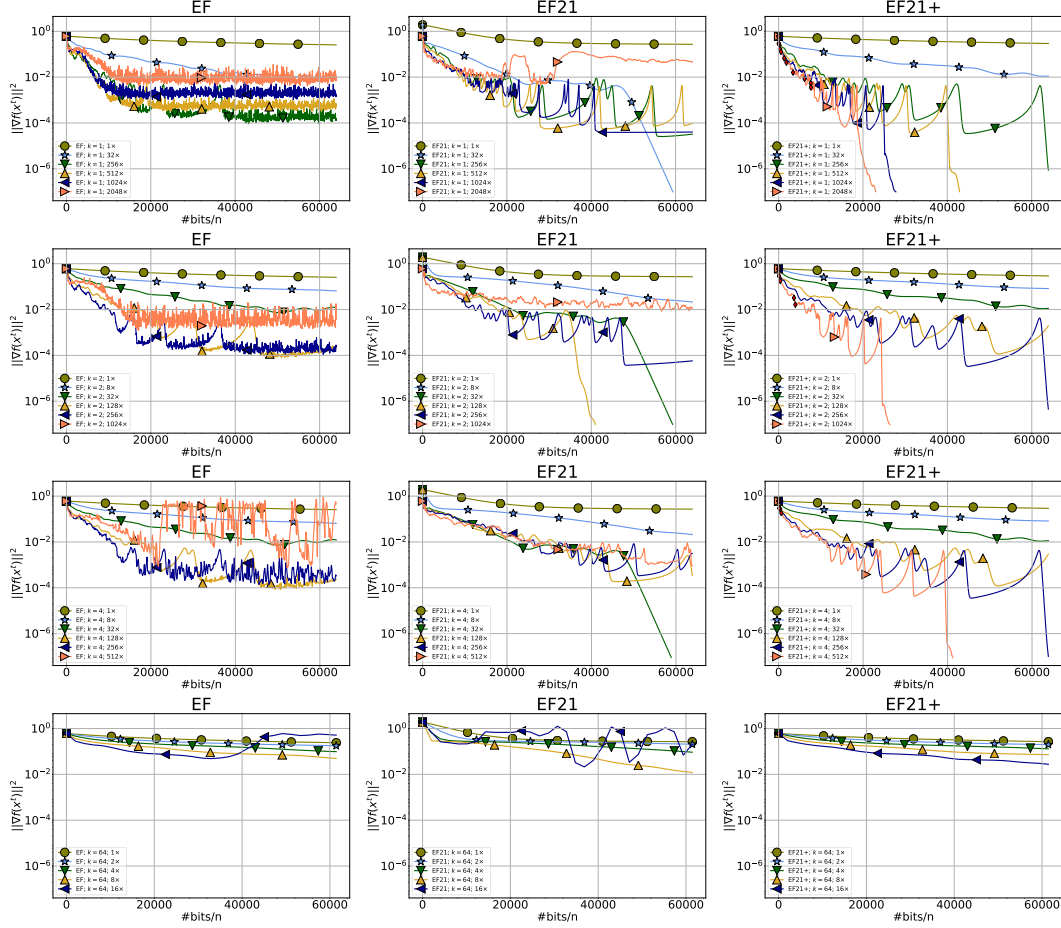

Figure 5: The performance of EF, EF21, and EF21+ with Top- $k$  compressor, and for increasing stepsizes. Each row corresponds to a different value of  $k \in \{1, 2, 4, 64\}$ . The dataset used: a9a. By  $1\times, 2\times, 4\times$  (and so on) we indicate that the stepsize was set to a multiple of the largest stepsize predicted by our theory.

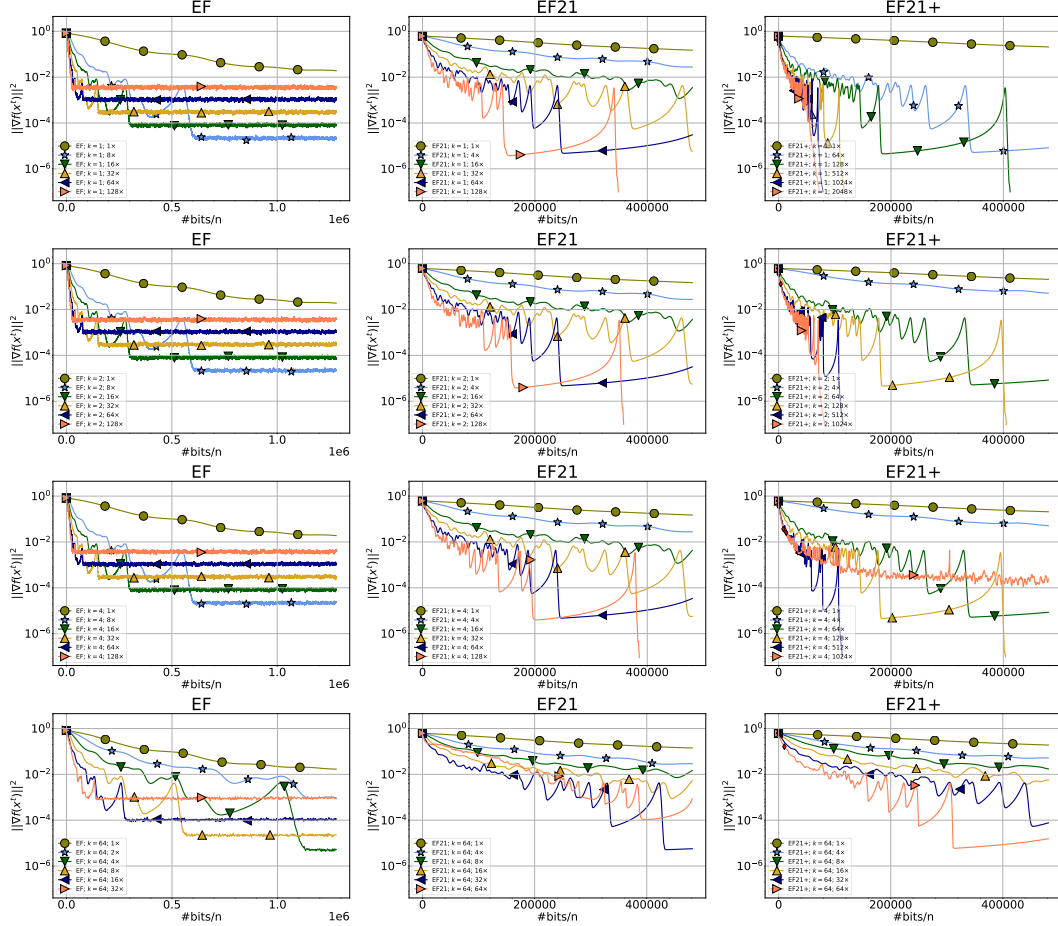

Figure 6: The performance of EF, EF21, and EF21+ with Top- $k$  compressor, and for increasing stepsizes. Each row corresponds to a different value of  $k \in \{1, 2, 4, 64\}$ . The dataset used: w8a. By  $1\times, 2\times, 4\times$  (and so on) we indicate that the stepsize was set to a multiple of the largest stepsize predicted by our theory.

### A.1.2 Experiment 2: Fine-tuning $k$ and the stepsizes (extension)

This sequence of experiments extends the results presented in the similar paragraph of Section 5. In these plots we focus on the effect of the parameter  $k$  on convergence. For each method, dataset, and  $k$ , the stepsize is fine-tuned (based on the fine-tuning results from Section A.1.1). Note that the theoretical stepsize allowed by Theorem 2 increases with the increase of  $k$ .

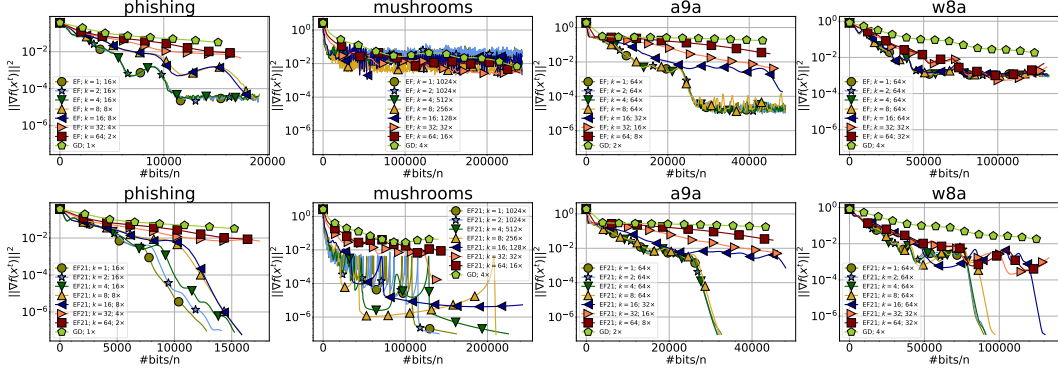

Figure 7: Effect of the parameter  $k$  on convergence. For each method, dataset and  $k$  the stepsize is fine-tuned. By  $1\times, 2\times, 4\times$  (and so on) we indicate that the stepsize was set to a multiple of the largest stepsize predicted by our theory.

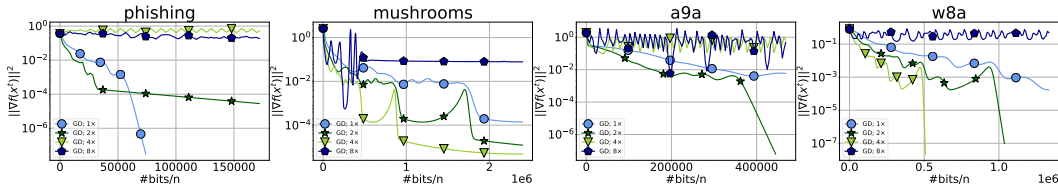

Figure 8: GD tuning.

We see that the best choice of  $k$  relates to 1, 2 or 4, which confirms that both EF21 and EF are more communication efficient compared to GD.

## A.2 Experiments with least squares

In this section we will test on a function satisfying the PL condition (see Assumption 2). In particular, we consider the function

$$f(x) = \frac{1}{N} \sum_{i=1}^N (a_i^\top x - y_i)^2,$$

where  $a_i \in \mathbb{R}^d, y_i \in \{-1, 1\}$  are the training data, and  $N$  is the total number of datapoints. We consider the same datasets as for the logistic regression problem (see Table 3).

### A.2.1 Experiment 1: Stepsize tolerance

In this set of experiments we test the robustness/tolerance of EF, EF21, and EF21+ to large stepsizes, using Top- $k$  [Alistarh et al., 2017] as a canonical example of biased compressor  $\mathcal{C}$ . For each plot, we vary the stepsize within the powers of 2 starting from the largest theoretically accepted  $\gamma$ . For example, for  $k = 2$  and EF21+ with `mushrooms` dataset we consider factors from the set  $\{1, 4, 64, 256, 1024\}$  and select the stepsize as a multiple of the upper bound stated in Theorem 2. Red diamond markers indicate the iterations at which EF21+ method uses mostly DCGD steps. More precisely, the red diamond marker appears on the plot if the distortion  $\|\mathcal{C}(s) - s\|$  is smaller than  $\|\mathcal{M}(s) - s\|$  for at least half of the workers, where  $s = \nabla f_i(x^{t+1})$ . For more details, see Figures 9–12, where parameter  $k$  is fixed within each row and each column correspond to a particular method.

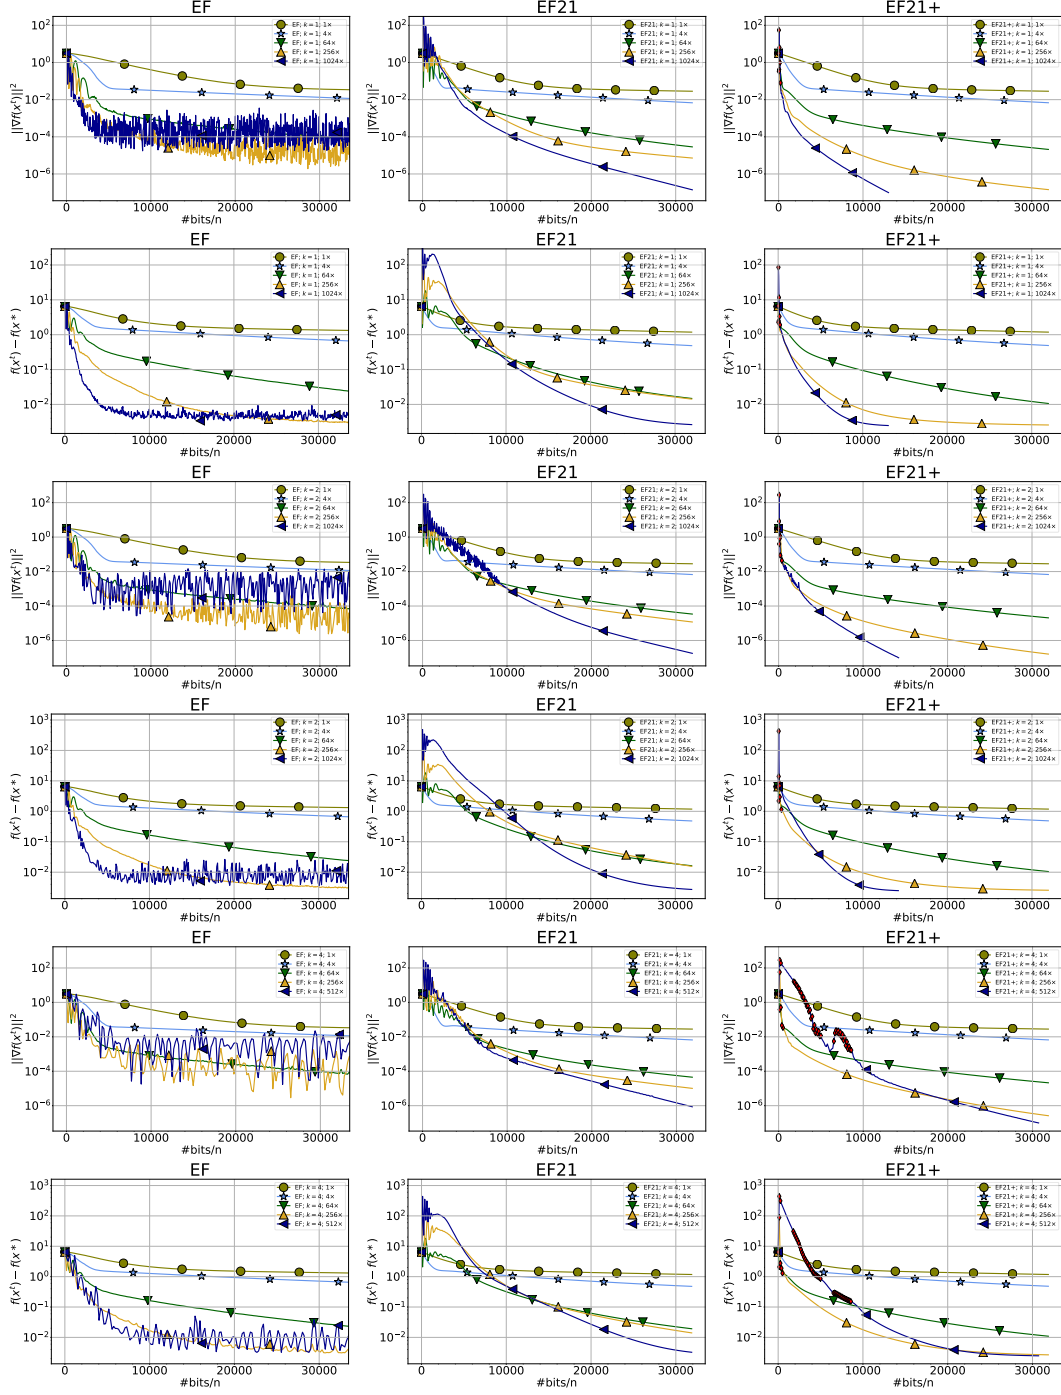

Figure 9: The performance of EF, EF21, and EF21+ with Top- $k$  compressor, and for increasing stepsizes. The dataset used: phishing. By  $1\times, 2\times, 4\times$  (and so on) we indicate that the stepsize was set to a multiple of the largest stepsize predicted by our theory.



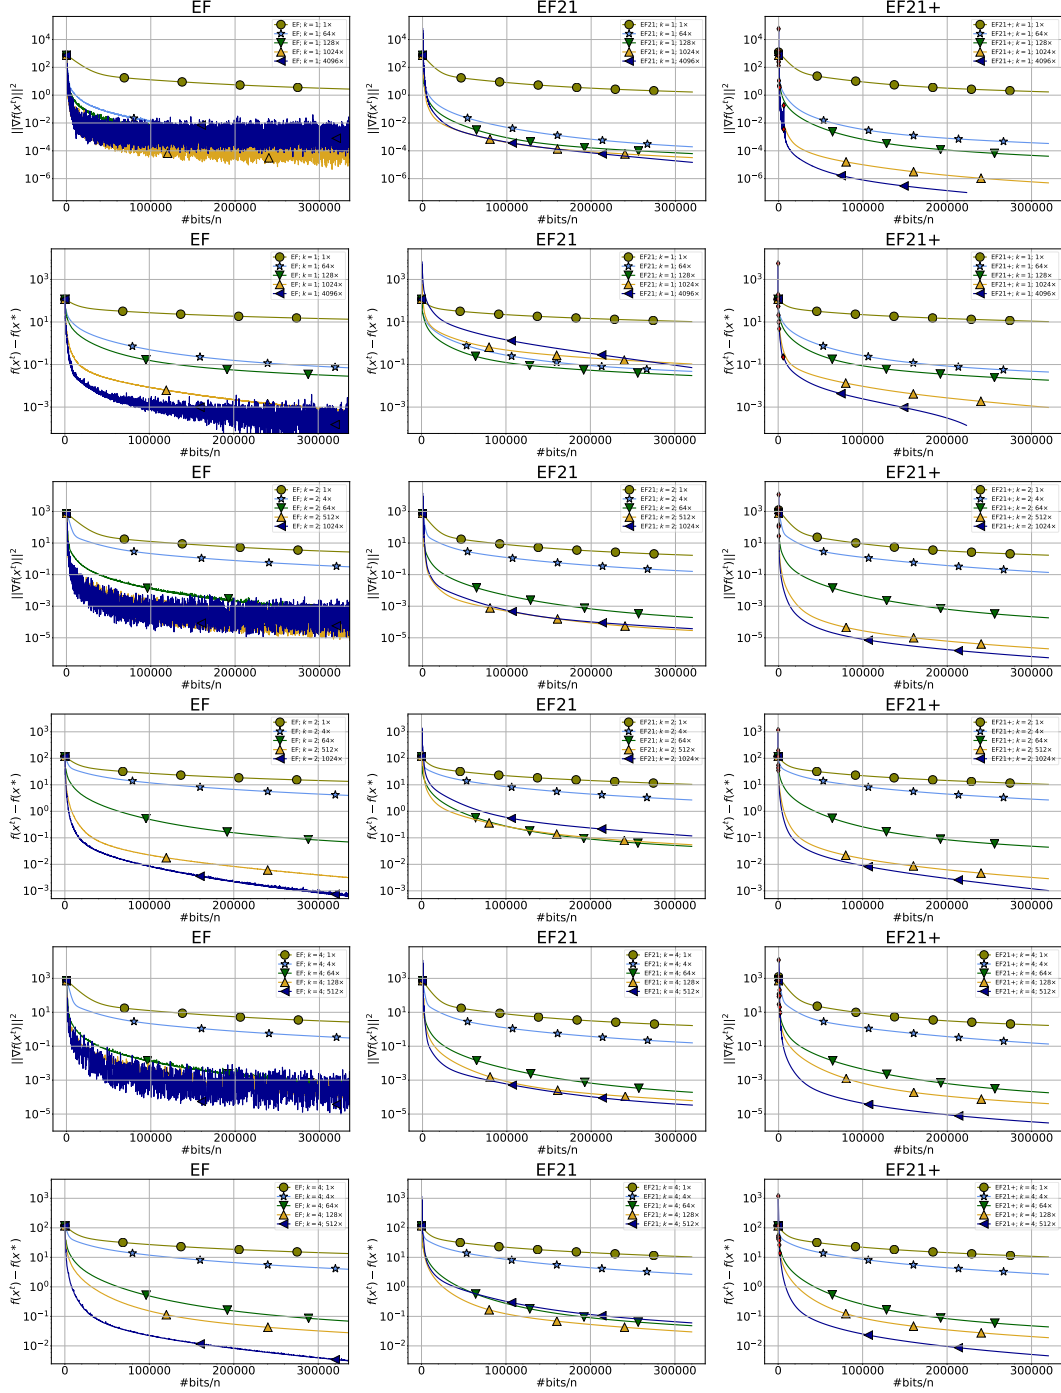

Figure 10: The performance of EF, EF21, and EF21+ with Top- $k$  compressor, and for increasing stepsizes. The dataset used: mushrooms. By  $1\times, 2\times, 4\times$  (and so on) we indicate that the stepsize was set to a multiple of the largest stepsize predicted by our theory.

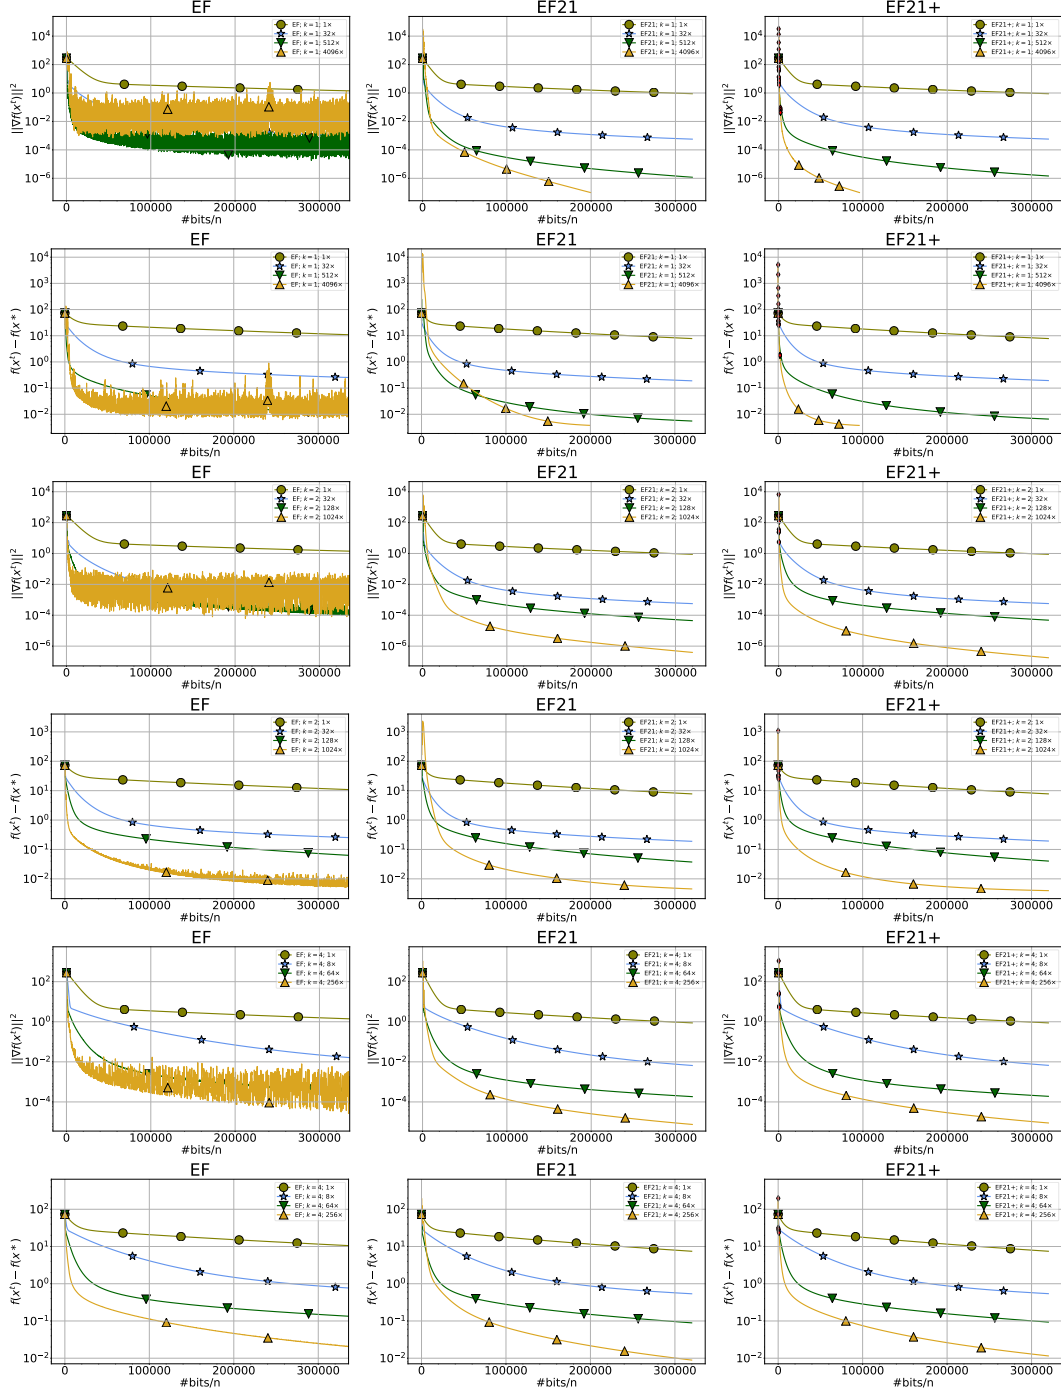

Figure 11: The performance of EF, EF21, and EF21+ with Top- $k$  compressor, and for increasing stepsizes. The dataset used: a9a. By  $1\times$ ,  $2\times$ ,  $4\times$  (and so on) we indicate that the stepsize was set to a multiple of the largest stepsize predicted by our theory.

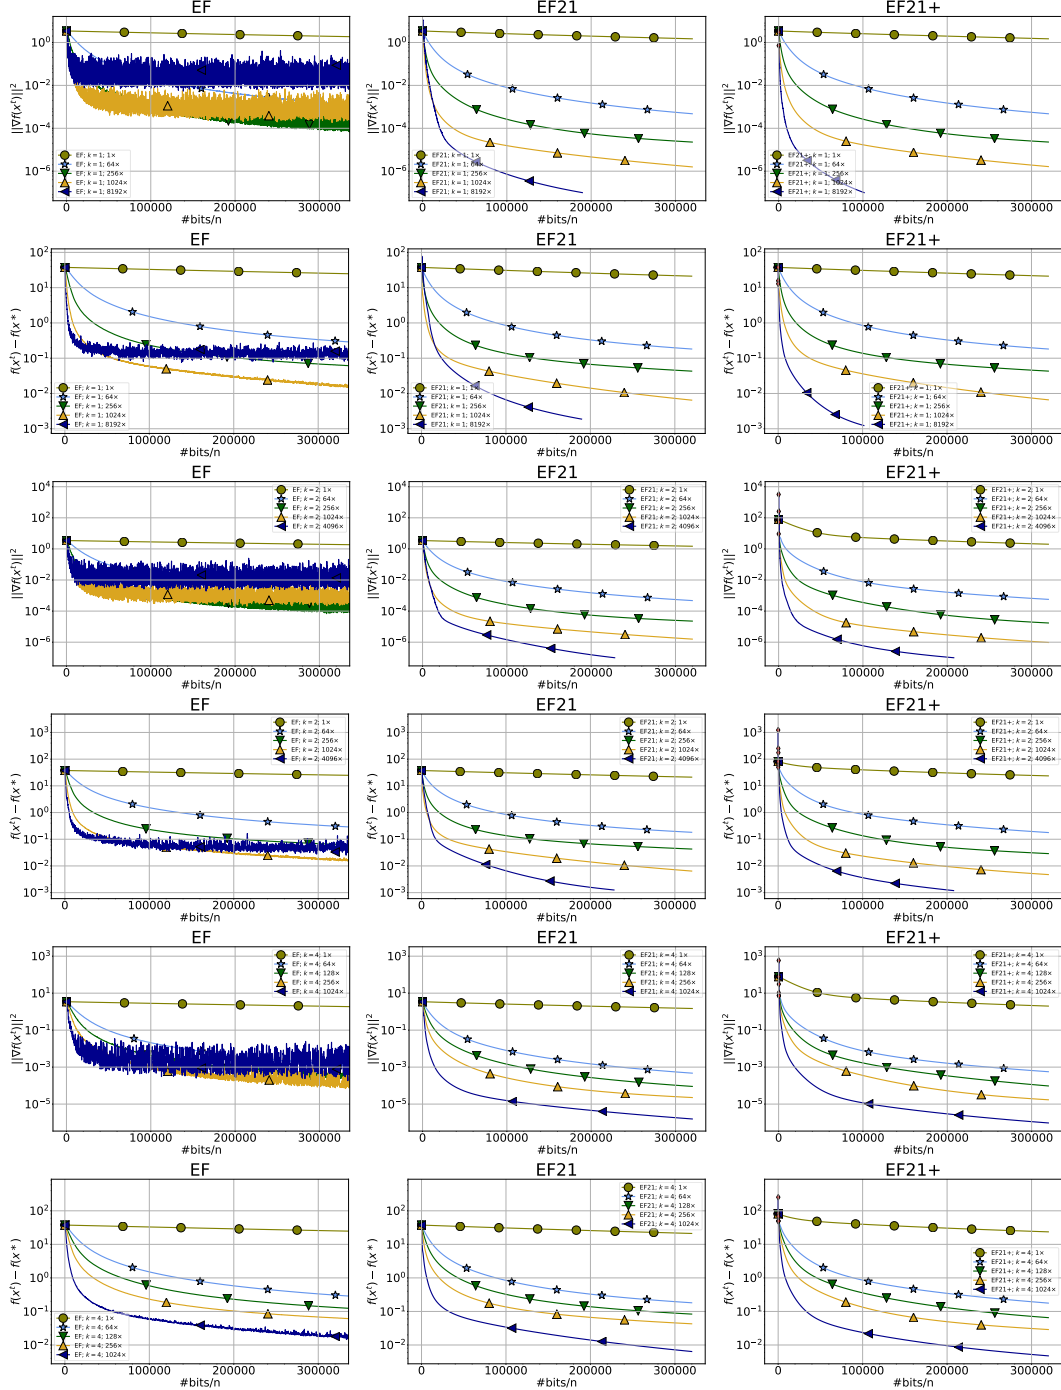

Figure 12: The performance of EF, EF21, and EF21+ with Top- $k$  compressor, and for increasing stepsizes. The dataset used:  $w8a$ . By  $1\times$ ,  $2\times$ ,  $4\times$  (and so on) we indicate that the stepsize was set to a multiple of the largest stepsize predicted by our theory.

All of the figures above illustrate that in the PL setting, EF21 and EF21+ tolerate much larger stepsizes than EF, which makes them more efficient in practice. Moreover, in all experiments with large stepsizes ( $512\times$ – $4096\times$ ), EF starts oscillating, which hinders the convergence to the desired tolerance.

### A.3 Deep learning experiments

In this section, we replace full gradient  $\nabla f_i(x^{k+1})$  in the algorithms EF21 and EF by its stochastic estimator (minibatch without replacement), and conduct several deep learning experiments for multi-class image classification. In particular, we compare our EF21 method to EF by running ResNet18 [He et al., 2016] and VGG11 models on the CIFAR-10 [Krizhevsky et al., 2009] dataset.

We implement the algorithms in PyTorch [Paszke et al., 2019] and run the experiments on several GPUs. We used 3 different GPU cluster node types in total within all experiments:

1. NVIDIA GeForce GTX 1080 Ti;
2. NVIDIA GeForce RTX 2080 Ti;
3. NVIDIA Tesla V100.

The dataset is split into  $n = 5$  equal parts. Total train set size for CIFAR-10 is 50,000. The test set for evaluation has 10,000 data points. The train set is split into batches of size  $\tau \in \{128, 1024\}$ . The first four workers own equal number of batches of data, while the last worker has the rest.

#### A.3.1 Tuned stepsizes

In our first experiments, summarized in Figures 13 and 14, we fix  $k \approx 0.05D$  and  $\tau = 1024$  for ResNet18, and  $\tau = 128$  for VGG11.<sup>6</sup> We tune the stepsize starting from  $10^{-3}$  as a baseline, and progressively increase it by a factor of 2. In Figure 13 we compare EF, EF21, EF21+, and SGD with the best tuned stepsizes. The experiment shows that during the training, both EF and EF21 (EF21+) perform similarly with a slight improvement in the new EF21 method. Moreover, EF21 achieves better test accuracy for both NN architectures.

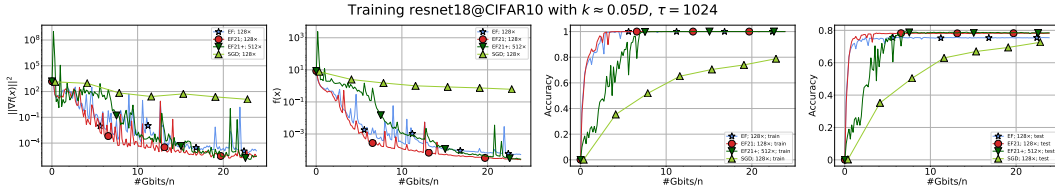

Figure 13: ResNet18 on CIFAR-10.

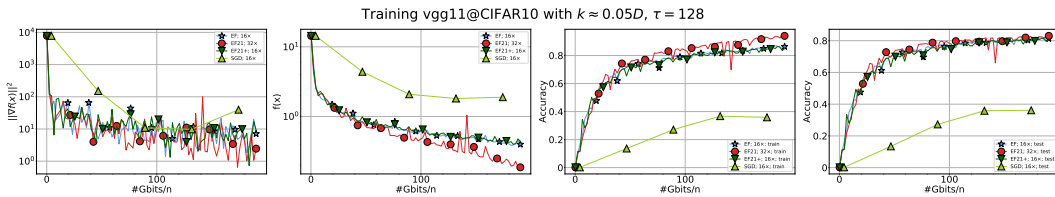

Figure 14: VGG11 on CIFAR-10.

#### A.3.2 Dependence on $k$

In this experiment, we fix the batch size  $\tau = 1024$  and a medium stepsize  $\gamma = 1.6 \cdot 10^{-2}$ . We demonstrate that choosing smaller  $k$  in the Markov compressor makes the method more communication efficient, and helps it to achieve higher test accuracy more quickly.

<sup>6</sup> $D$  is the number of model parameters. For ResNet18,  $D = 11,511,784$ , and for VGG11,  $D = 132,863,336$ .

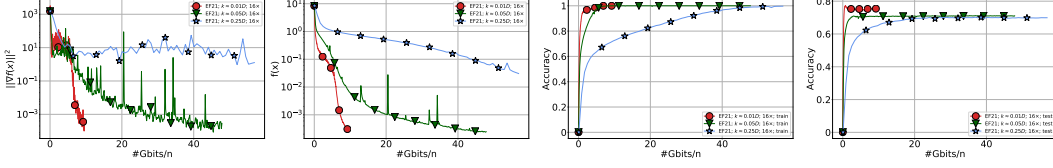

Figure 15: ResNet18 on CIFAR-10, minibatch size  $\tau = 1024$ .

## B Proofs for Section 4.1: Distortion of Markov Compressor

We have made a couple statements, without proof, at the end of Section 4.1 which were not critical to the development of our results. Here we provide the justification.

**Lemma 1.** Let  $\{v^t\}_{t \geq 0}$  be any sequence of vectors in  $\mathbb{R}^d$ . Let

$$D^t \stackrel{\text{def}}{=} \|\mathcal{M}(v^t) - v^t\|^2 \quad (20)$$

be the distortion of the Markov compressor  $\mathcal{M}$  on input  $v^t$ . Then

$$\mathbb{E}[D^t] \leq (1 - \theta)^t \mathbb{E}[D^0] + \beta \sum_{i=0}^{t-1} (1 - \theta)^i \Delta^{t-i}, \quad (21)$$

where  $\Delta^t \stackrel{\text{def}}{=} \|v^{t+1} - v^t\|^2$ .

*Proof.* By conditioning on  $\mathcal{M}(v^t)$ , we get

$$\begin{aligned} \mathbb{E}[D^{t+1} | \mathcal{M}(v^t)] &= \mathbb{E}[\|\mathcal{M}(v^{t+1}) - v^{t+1}\|^2 | \mathcal{M}(v^t)] \\ &= \mathbb{E}[\|\mathcal{M}(v^t) + \mathcal{C}(v^{t+1} - \mathcal{M}(v^t)) - v^{t+1}\|^2 | \mathcal{M}(v^t)] \\ &\stackrel{(3)}{\leq} (1 - \alpha) \|v^{t+1} - \mathcal{M}(v^t)\|^2 \\ &\leq (1 - \alpha) \left[ (1 + s) \|v^t - \mathcal{M}(v^t)\|^2 + (1 + s^{-1}) \|v^{t+1} - v^t\|^2 \right] \\ &= (1 - \theta) \|v^t - \mathcal{M}(v^t)\|^2 + \beta \Delta^t, \end{aligned} \quad (22)$$

where  $s > 0$  is small enough so that that  $1 - \theta = (1 - \alpha)(1 + s) < 1$ , and we define  $\beta = (1 - \alpha)(1 + s^{-1})$ .

By applying the tower property, we get

$$\begin{aligned} \mathbb{E}[D^{t+1}] &= \mathbb{E}[\mathbb{E}[D^{t+1} | \mathcal{M}(v^t)]] \\ &\stackrel{(22)}{=} (1 - \theta) \mathbb{E}[\|v^t - \mathcal{M}(v^t)\|^2] + \beta \Delta^t \\ &\stackrel{(20)}{=} (1 - \theta) \mathbb{E}[D^t] + \beta \Delta^t. \end{aligned}$$

It remains to unroll this recurrence. □

**Corollary 1.** Assume that  $\Delta^t \leq (1 - \phi)^t \Delta^0$  for all  $t \geq 0$  and some  $\phi > 0$ . Then

$$\lim_{t \rightarrow \infty} \mathbb{E}[D^t] = 0.$$

*Proof.* Using Lemma 1, we get

$$\begin{aligned}
\mathbb{E} [D^t] &\stackrel{(21)}{\leq} (1 - \theta)^t \mathbb{E} [D^0] + \beta \sum_{i=0}^{t-1} (1 - \theta)^i \Delta^{t-i} \\
&\leq (1 - \theta)^t \mathbb{E} [D^0] + \beta \Delta^0 \sum_{i=0}^{t-1} (1 - \theta)^i (1 - \phi)^{t-i} \\
&\leq (1 - \theta)^t \mathbb{E} [D^0] + \beta \Delta^0 \sum_{i=0}^{t-1} (1 - \min\{\theta, \phi\})^t \\
&= (1 - \theta)^t \mathbb{E} [D^0] + t(1 - \min\{\theta, \phi\})^t \beta \Delta^0.
\end{aligned}$$

Clearly, the right hand side converges to 0 as  $t \rightarrow \infty$ .  $\square$

## C Proofs for Section 4.4: Theorem 1

In this section we describe the original error feedback (EF) method, restate the EF–EF21 equivalence theorem (Theorem 1), and prove it.

### C.1 The original error feedback method

The EF method is described in Algorithm 3. We write it in a slightly non-conventional but equivalent form which facilitates comparison with EF21.

EF works as follows. In iteration  $t = 0$ , each node  $i$  computes its local gradient  $\nabla f_i(x^0)$ , and “would like” to communicate the vector  $\gamma \nabla f_i(x^0)$  to the master, which is supposed to perform an aggregation of these vectors via averaging, and perform the gradient-type step

$$x^1 = x^0 - \frac{1}{n} \sum_{i=1}^n \gamma \nabla f_i(x^0).$$

This, in fact, is one step of gradient descent. However, the vector  $\gamma \nabla f_i(x^0)$  is hard to communicate. For this reason, this vector needs to be compressed, and the compressed version needs to be communicated instead. This would lead to the iteration

$$x^1 = x^0 - \frac{1}{n} \sum_{i=1}^n w_i^0, \quad \text{where} \quad w_i^0 = \mathcal{C}(\gamma \nabla f_i(x^0)),$$

which is a variant<sup>7</sup> of distributed CGD (DCGD).

However, it is well known that DCGD may diverge. The key idea of error feedback is to compute the *error*

$$e_i^1 = \gamma \nabla f_i(x^0) - \mathcal{C}(\gamma \nabla f_i(x^0)) = \gamma \nabla f_i(x^0) - w_i^0,$$

which is the difference between the **message**  $\gamma \nabla f_i(x^0)$  **we want to communicate**, and the **compressed message**  $w_i^0$  **we actually communicate**. This error is then *added* to the message  $\gamma \nabla f_i(x^1)$  we would normally want to communicate in the *next* iteration, providing feedback/compensation for the error incurred. That is, in the next iteration, node  $i$  communicates the compressed vector

$$w_i^1 = \mathcal{C}(e_i^1 + \gamma \nabla f_i(x^1))$$

instead. Note that since in iteration 1 we wanted to communicate the vector  $e_i^1 + \gamma \nabla f_i(x^1)$ , the error in the next iteration becomes

$$e_i^2 = e_i^1 + \gamma \nabla f_i(x^1) - \mathcal{C}(e_i^1 + \gamma \nabla f_i(x^1)) = e_i^1 + \gamma \nabla f_i(x^1) - w_i^1.$$

This process is repeated, leading to Algorithm 3.

<sup>7</sup>This method is DCGD if  $\mathcal{C}$  is positively homogeneous, i.e., of  $\mathcal{C}(\gamma g) = \gamma \mathcal{C}(g)$  for every  $\gamma > 0$  and  $g \in \mathbb{R}^d$ . However, even without positive homogeneity, this variant has the same theoretical properties as standard DCGD.

---

**Algorithm 3** EF (Original error feedback)

---

```
1: Each node  $i = 1, \dots, n$  sets the initial error to zero:  $e_i^0 = 0$ 
2: Each node  $i = 1, \dots, n$  computes  $w_i^0 = \mathcal{C}(\gamma \nabla f_i(x^0))$  and sends this to the master
3: for  $t = 0, 1, 2, \dots, T - 1$  do
4:   Master computes  $x^{t+1} = x^t - \frac{1}{n} \sum_{i=1}^n w_i^t$ 
5:   for all nodes  $i = 1, \dots, n$  in parallel do
6:     Compute current error:  $e_i^{t+1} = e_i^t + \gamma \nabla f_i(x^t) - w_i^t$ 
7:     Compute new local gradient  $\nabla f_i(x^{t+1})$ 
8:     Compute error-compensated (stepsize-scaled) gradient  $w_i^{t+1} = \mathcal{C}(e_i^{t+1} + \gamma \nabla f_i(x^{t+1}))$ 
9:     Send  $w_i^{t+1}$  to the master
10:  end for
11: end for
```

---

## C.2 The proof of Theorem 1

**Theorem 1.** Assume that  $\mathcal{C}$  is deterministic, positive homogeneous and additive. Then EF (Algorithm 3) and EF21 (Algorithm 2) produce the same sequences of iterates  $\{x^t\}_{t \geq 0}$ .

*Proof.* To prove this result, it suffices to show that  $w_i^t = \gamma g_i^t$  for all  $t \geq 0$ . We perform this proof by induction.

**Base case ( $t = 0$ ):** Recall that  $w_i^0 = \mathcal{C}(\gamma \nabla f_i(x^0))$  and  $g_i^0 = \mathcal{C}(\nabla f_i(x^0))$ . By positive homogeneity of  $\mathcal{C}$ , we have

$$w_i^0 = \mathcal{C}(\gamma \nabla f_i(x^0)) = \gamma \mathcal{C}(\nabla f_i(x^0)) = \gamma g_i^0.$$

**Inductive step:** Assume that  $w_i^t = \gamma g_i^t$  holds for some  $t \geq 0$ . Note that in view of how EF operates, we have

$$w_i^{t+1} = \mathcal{C}(e_i^{t+1} + \gamma \nabla f_i(x^{t+1})) = \mathcal{C}(e_i^t + \gamma \nabla f_i(x^t) - w_i^t + \gamma \nabla f_i(x^{t+1})).$$

Since we assume that  $\mathcal{C}$  is additive, and because  $w_i^t = \mathcal{C}(e_i^t + \gamma \nabla f_i(x^t))$ , we can write

$$\begin{aligned} w_i^{t+1} &= \mathcal{C}(e_i^t + \gamma \nabla f_i(x^t)) + \mathcal{C}(\gamma \nabla f_i(x^{t+1}) - w_i^t) \\ &= w_i^t + \mathcal{C}(\gamma \nabla f_i(x^{t+1}) - w_i^t). \end{aligned}$$

Finally, using positive homogeneity, our inductive hypothesis, and the way  $g_i^t$  is updated in EF21, we can write

$$\begin{aligned} w_i^{t+1} &= \gamma \left( \frac{1}{\gamma} w_i^t + \mathcal{C} \left( \nabla f_i(x^{t+1}) - \frac{1}{\gamma} w_i^t \right) \right) \\ &= \gamma (g_i^t + \mathcal{C}(\nabla f_i(x^{t+1}) - g_i^t)) \\ &= \gamma g_i^{t+1}, \end{aligned}$$

which concludes our proof.  $\square$

## D Four Lemmas Needed in the Proofs of Theorems 2 and 3

We first state several auxiliary results we need for the proofs of our main theorems.

### D.1 Compression distortion bound

The following lemma play a key role in our analysis. It characterizes the change of the distortion imparted by the Markov compressor in a single iteration.

**Lemma 2.** Let  $\mathcal{C} \in \mathbb{B}(\alpha)$  for  $0 < \alpha \leq 1$ . Define  $G_i^t \stackrel{\text{def}}{=} \|g_i^t - \nabla f_i(x^t)\|^2$  and  $W^t \stackrel{\text{def}}{=} \{g_1^t, \dots, g_n^t, x^t, x^{t+1}\}$ . For any  $s > 0$  we have

$$\mathbb{E} [G_i^{t+1} \mid W^t] \leq (1 - \theta(s))G_i^t + \beta(s) \|\nabla f_i(x^{t+1}) - \nabla f_i(x^t)\|^2, \quad (23)$$

where

$$\theta(s) \stackrel{\text{def}}{=} 1 - (1 - \alpha)(1 + s), \quad \text{and} \quad \beta(s) \stackrel{\text{def}}{=} (1 - \alpha)(1 + s^{-1}). \quad (24)$$

*Proof.*

$$\begin{aligned} \mathbb{E} [G_i^{t+1} | W^t] &= \mathbb{E} \left[ \|g_i^{t+1} - \nabla f_i(x^{t+1})\|^2 | W^t \right] \\ &= \mathbb{E} \left[ \|g_i^t + \mathcal{C}(\nabla f_i(x^{t+1}) - g_i^t) - \nabla f_i(x^{t+1})\|^2 | W^t \right] \\ &\stackrel{(3)}{\leq} (1 - \alpha) \|\nabla f_i(x^{t+1}) - g_i^t\|^2 \\ &\leq (1 - \alpha)(1 + s) \|\nabla f_i(x^t) - g_i^t\|^2 \\ &\quad + (1 - \alpha)(1 + s^{-1}) \|\nabla f_i(x^{t+1}) - \nabla f_i(x^t)\|^2, \end{aligned}$$

where the last inequality follows from Young's inequality, which states that for any  $a, b \in \mathbb{R}^d$  and any  $s > 0$  we have  $\|a + b\|^2 \leq (1 + s) \|a\|^2 + (1 + s^{-1}) \|b\|^2$ .  $\square$

In particular, consider node  $i$  and iteration  $t$ . Applying Markov compressor specific to node  $i$  (let us call it  $\mathcal{M}_i$ ) to  $v_i^t = \nabla f_i(x^t)$ , we get  $g_i^t = \mathcal{M}_i(v_i^t)$ . In the next iteration, we apply Markov compressor to the new gradient,  $v_i^{t+1} = \nabla f_i(x^{t+1})$ , and the compressed vector is  $g_i^{t+1} = \mathcal{M}_i(v_i^{t+1})$ . Note that  $G_i^t$  is the distortion of Markov compressor at iteration  $t$ , and that (23) describes how this distortion changes from iteration  $t$  to iteration  $t + 1$ . The expectation on the left hand side is over the randomness inherent in  $\mathcal{C}$  (and so, for example, if  $\mathcal{C}$  is the Top- $k$  compressor, expectation is not needed).

Note that since the distortion of the Markov compressor at iteration  $t$  is equal to

$$G_i^t \stackrel{\text{def}}{=} \|g_i^t - \nabla f_i(x^t)\|^2,$$

(23) says that, provided that  $\theta(s) > 0$ , the distortion decreases by the factor of  $1 - \theta(s)$ , subject to the additive error

$$\varepsilon_i^t(s) \stackrel{\text{def}}{=} \beta(s) \|\nabla f_i(x^{t+1}) - \nabla f_i(x^t)\|^2.$$

That is, (23) can be written in the form

$$\mathbb{E} \left[ \|\mathcal{M}_i(\nabla f_i(x^{t+1})) - \nabla f_i(x^{t+1})\|^2 | W^t \right] \leq (1 - \theta(s)) \|\mathcal{M}_i(\nabla f_i(x^t)) - \nabla f_i(x^t)\|^2 + \varepsilon_i^t(s).$$

Note that since our method converges, the difference  $\nabla f_i(x^{t+1}) - \nabla f_i(x^t)$  decreases to zero, and hence the additive error  $\varepsilon_i^t(s)$  decreases to zero, too.

Note that the distortion evolution mechanism described by Lemma 2 is fundamentally different from the distortion evolution mechanism behind the vanilla biased compressor  $\mathcal{C}$ . Indeed, for this compressor we instead have

$$\mathbb{E} \left[ \|\mathcal{C}(\nabla f_i(x^{t+1})) - \nabla f_i(x^{t+1})\|^2 | W^t \right] \leq (1 - \alpha) \|\nabla f_i(x^{t+1})\|^2.$$

This inequality bounds the distortion, but does not provide a *recursion* characterizing how the distortion changes from one iteration to another.

## D.2 Optimal choice of $s$ in Lemma 2

Notice that in Lemma 2 we have some freedom in how to choose  $s$ . It turns out, and this will be apparent from the proofs of Theorems 2 and 3, that the optimal way of choosing  $s$  is to minimize the ratio  $\frac{\beta(s)}{\theta(s)}$ . The next lemma characterizes the optimal choice of  $s$ . Note that the upper bound on  $s$  is equivalent to requiring that  $\theta(s) > 0$ , i.e., that the first term on the right hand side in (23) results in a contraction.

**Lemma 3.** *Let  $0 < \alpha < 1$  and for  $s > 0$  let  $\theta(s)$  and  $\beta(s)$  be as in (24). Then the solution of the optimization problem*

$$\min_s \left\{ \frac{\beta(s)}{\theta(s)} : 0 < s < \frac{\alpha}{1 - \alpha} \right\} \quad (25)$$



is given by  $s^* = \frac{1}{\sqrt{1-\alpha}} - 1$ . Furthermore,  $\theta(s^*) = 1 - \sqrt{1-\alpha}$ ,  $\beta(s^*) = \frac{1-\alpha}{1-\sqrt{1-\alpha}}$  and

$$\sqrt{\frac{\beta(s^*)}{\theta(s^*)}} = \frac{1}{\sqrt{1-\alpha}} - 1 = \frac{1}{\alpha} + \frac{\sqrt{1-\alpha}}{\alpha} - 1 \leq \frac{2}{\alpha} - 1. \quad (26)$$

*Proof.* After simple algebraic manipulation, it is easy to see that

$$\frac{\beta(s)}{\theta(s)} = \left( \frac{1}{1-\alpha} - \frac{1}{(1+s)(1-\alpha)} - s \right)^{-1},$$

and hence the optimization problem (25) is equivalent to the problem

$$\min_s \left\{ \varphi(s) \stackrel{\text{def}}{=} \frac{1}{(1+s)(1-\alpha)} + s : 0 < s < \frac{\alpha}{1-\alpha} \right\}.$$

Note that  $\varphi$  is convex, and that  $\varphi(0) = \varphi(\frac{\alpha}{1-\alpha}) = \frac{1}{1-\alpha}$ . Hence, the global minimum of  $\varphi$  must lie in the interval  $0 < s < \frac{\alpha}{1-\alpha}$ . Thus, we can drop the constraints, and find the solution by looking for a stationary point (i.e., for  $s^*$  satisfying  $\varphi'(s^*) = 0$ ), which leads to  $s^* = 1 - \sqrt{1-\alpha}$ . The rest follows by substituting the value  $s = s^*$  to the expressions for  $\theta(s)$ ,  $\beta(s)$  and  $\sqrt{\frac{\beta(s)}{\theta(s)}}$ .  $\square$

### D.3 A descent lemma

The next lemma, due to Li et al. [2021], gives a bound on the function value after one step of a method of the type

$$x^{t+1} \stackrel{\text{def}}{=} x^t - \gamma g^t,$$

where  $g^t \in \mathbb{R}^d$  is any vector, and  $\gamma > 0$  any scalar. The only assumption we need for it to hold is for  $f$  to have  $L$ -Lipschitz gradient.

**Lemma 4** ([Li et al., 2021]). *Suppose that function  $f$  is  $L$ -smooth and let  $x^{t+1} \stackrel{\text{def}}{=} x^t - \gamma g^t$ , where  $g^t \in \mathbb{R}^d$  is any vector, and  $\gamma > 0$  any scalar. Then we have*

$$f(x^{t+1}) \leq f(x^t) - \frac{\gamma}{2} \|\nabla f(x^t)\|^2 - \left( \frac{1}{2\gamma} - \frac{L}{2} \right) \|x^{t+1} - x^t\|^2 + \frac{\gamma}{2} \|g^t - \nabla f(x^t)\|^2. \quad (27)$$

### D.4 Stepsize selection

The only purpose of our final lemma is to get an easy-to-write bound on the stepsize. We achieve this at the cost of a slightly worse theoretical result, by at most a factor of two. In particular, in the proof of our main theorems, the stepsize needs to satisfy an inequality of the type

$$a\gamma^2 + b\gamma \leq 1 \quad (28)$$

where  $a, b$  are positive scalars. Instead of writing an algebraic expression for the largest  $\gamma$  satisfying this inequality (let's call this optimal stepsize  $\gamma^*$ ), we first observe that, necessarily,

$$\gamma^* \leq \min \left\{ \frac{1}{\sqrt{a}}, \frac{1}{b} \right\}.$$

Further, it is easy to verify that  $\gamma^- \stackrel{\text{def}}{=} \frac{1}{\sqrt{a+b}}$  satisfies the quadratic inequality (28), and that  $\gamma^+ \stackrel{\text{def}}{=} \frac{2}{\sqrt{a+b}}$  does not. So, any  $0 \leq \gamma \leq \gamma^-$  satisfies (28), and the upper bound is at most a factor of 2 worse than  $\gamma^*$ .

We now formalize the above observations.

**Lemma 5.** *Let  $a, b > 0$ . If  $0 \leq \gamma \leq \frac{1}{\sqrt{a+b}}$ , then  $a\gamma^2 + b\gamma \leq 1$ . Moreover, the bound is tight up to the factor of 2 since  $\frac{1}{\sqrt{a+b}} \leq \min \left\{ \frac{1}{\sqrt{a}}, \frac{1}{b} \right\} \leq \frac{2}{\sqrt{a+b}}$*

## E Proof of Theorem 2

*Proof.* **STEP 1.** Recall that Lemma 2 says that

$$\mathbb{E} \left[ \|g_i^{t+1} - \nabla f_i(x^{t+1})\|^2 \mid W^t \right] \stackrel{(23)}{\leq} (1-\theta) \|g_i^t - \nabla f_i(x^t)\|^2 + \beta \|\nabla f_i(x^{t+1}) - \nabla f_i(x^t)\|^2, \quad (29)$$

where  $\theta = \theta(s^*)$  and  $\beta = \beta(s^*)$  are given by Lemma 3. Averaging inequalities (29) over  $i \in \{1, 2, \dots, n\}$  gives

$$\begin{aligned} \mathbb{E} [G^{t+1} \mid W^t] &\stackrel{(14)}{=} \frac{1}{n} \sum_{i=1}^n \mathbb{E} \left[ \|g_i^{t+1} - \nabla f_i(x^{t+1})\|^2 \mid W^t \right] \\ &\stackrel{(29)}{\leq} (1-\theta) \frac{1}{n} \sum_{i=1}^n \|g_i^t - \nabla f_i(x^t)\|^2 + \beta \frac{1}{n} \sum_{i=1}^n \|\nabla f_i(x^{t+1}) - \nabla f_i(x^t)\|^2 \\ &\stackrel{(14)}{=} (1-\theta) G^t + \beta \frac{1}{n} \sum_{i=1}^n \|\nabla f_i(x^{t+1}) - \nabla f_i(x^t)\|^2 \\ &\leq (1-\theta) G^t + \beta \left( \frac{1}{n} \sum_{i=1}^n L_i^2 \right) \|x^{t+1} - x^t\|^2, \end{aligned} \quad (30)$$

where in the last step we have applied  $L_i$ -smoothness of functions  $f_i$  for  $i = 1, 2, \dots, n$ . Using Tower property in (30), we proceed to

$$\mathbb{E} [G^{t+1}] = \mathbb{E} [\mathbb{E} [G^{t+1} \mid W^t]] \stackrel{(30)}{\leq} (1-\theta) \mathbb{E} [G^t] + \beta \tilde{L}^2 \mathbb{E} [\|x^{t+1} - x^t\|^2]. \quad (31)$$

**STEP 2.** Next, using Lemma 4 and Jensen's inequality applied to the function  $x \mapsto \|x\|^2$ , we obtain the bound

$$\begin{aligned} f(x^{t+1}) &\stackrel{(27)}{\leq} f(x^t) - \frac{\gamma}{2} \|\nabla f(x^t)\|^2 - \left( \frac{1}{2\gamma} - \frac{L}{2} \right) \|x^{t+1} - x^t\|^2 + \frac{\gamma}{2} \left\| \frac{1}{n} \sum_{i=1}^n (g_i^t - \nabla f_i(x^t)) \right\|^2 \\ &\stackrel{(14)}{\leq} f(x^t) - \frac{\gamma}{2} \|\nabla f(x^t)\|^2 - \left( \frac{1}{2\gamma} - \frac{L}{2} \right) \|x^{t+1} - x^t\|^2 + \frac{\gamma}{2} G^t. \end{aligned} \quad (32)$$

Subtracting  $f^{\text{inf}}$  from both sides of (32) and taking expectation, we get

$$\begin{aligned} \mathbb{E} [f(x^{t+1}) - f^{\text{inf}}] &\leq \mathbb{E} [f(x^t) - f^{\text{inf}}] - \frac{\gamma}{2} \mathbb{E} [\|\nabla f(x^t)\|^2] \\ &\quad - \left( \frac{1}{2\gamma} - \frac{L}{2} \right) \mathbb{E} [\|x^{t+1} - x^t\|^2] + \frac{\gamma}{2} \mathbb{E} [G^t]. \end{aligned} \quad (33)$$

**COMBINING STEP 1 AND STEP 2.** Let  $\delta^t \stackrel{\text{def}}{=} \mathbb{E} [f(x^t) - f^{\text{inf}}]$ ,  $s^t \stackrel{\text{def}}{=} \mathbb{E} [G^t]$  and  $r^t \stackrel{\text{def}}{=} \mathbb{E} [\|x^{t+1} - x^t\|^2]$ . Then by adding (33) with a  $\frac{\gamma}{2\theta}$  multiple of (31) we obtain

$$\begin{aligned} \delta^{t+1} + \frac{\gamma}{2\theta} s^{t+1} &\leq \delta^t - \frac{\gamma}{2} \|\nabla f(x^t)\|^2 - \left( \frac{1}{2\gamma} - \frac{L}{2} \right) r^t + \frac{\gamma}{2} s^t + \frac{\gamma}{2\theta} \left( \beta \tilde{L}^2 r^t + (1-\theta) s^t \right) \\ &= \delta^t + \frac{\gamma}{2\theta} s^t - \frac{\gamma}{2} \|\nabla f(x^t)\|^2 - \left( \frac{1}{2\gamma} - \frac{L}{2} - \frac{\gamma}{2\theta} \beta \tilde{L}^2 \right) r^t \\ &\leq \delta^t + \frac{\gamma}{2\theta} s^t - \frac{\gamma}{2} \|\nabla f(x^t)\|^2. \end{aligned}$$

The last inequality follows from the bound  $\gamma^2 \frac{\beta \tilde{L}^2}{\theta} + L\gamma \leq 1$ , which holds because of Lemma 5 and our assumption on the stepsize. By summing up inequalities for  $t = 0, \dots, T-1$ , we get

$$0 \leq \delta^T + \frac{\gamma}{2\theta} s^T \leq \delta^0 + \frac{\gamma}{2\theta} s^0 - \frac{\gamma}{2} \sum_{t=0}^{T-1} \mathbb{E} [\|\nabla f(x^t)\|^2].$$

Multiplying both sides by  $\frac{2}{\gamma T}$ , after rearranging we get

$$\sum_{t=0}^{T-1} \frac{1}{T} \mathbb{E} \left[ \|\nabla f(x^t)\|^2 \right] \leq \frac{2\delta^0}{\gamma T} + \frac{s^0}{\theta T}.$$

It remains to notice that the left hand side can be interpreted as  $\mathbb{E} \left[ \|\nabla f(\hat{x}^T)\|^2 \right]$ , where  $\hat{x}^T$  is chosen from  $x^0, x^1, \dots, x^{T-1}$  uniformly at random.  $\square$

## F Proof of Theorem 3

*Proof.* We proceed as in the previous proof, but use the PL inequality and subtract  $f(x^*)$  from both sides of (32) to get

$$\begin{aligned} \mathbb{E} [f(x^{t+1}) - f(x^*)] &\stackrel{(32)}{\leq} \mathbb{E} [f(x^t) - f(x^*)] - \frac{\gamma}{2} \|\nabla f(x^t)\|^2 - \left( \frac{1}{2\gamma} - \frac{L}{2} \right) \|x^{t+1} - x^t\|^2 + \frac{\gamma}{2} G^t \\ &\leq (1 - \gamma\mu) \mathbb{E} [f(x^t) - f(x^*)] - \left( \frac{1}{2\gamma} - \frac{L}{2} \right) \|x^{t+1} - x^t\|^2 + \frac{\gamma}{2} G^t. \end{aligned}$$

Let  $\delta^t \stackrel{\text{def}}{=} \mathbb{E} [f(x^t) - f(x^*)]$ ,  $s^t \stackrel{\text{def}}{=} \mathbb{E} [G^t]$  and  $r^t \stackrel{\text{def}}{=} \mathbb{E} [\|x^{t+1} - x^t\|^2]$ . Then by adding the above inequality with a  $\frac{\gamma}{\theta}$  multiple of (31), we obtain

$$\begin{aligned} \delta^{t+1} + \frac{\gamma}{\theta} s^{t+1} &\leq (1 - \gamma\mu) \delta^t - \left( \frac{1}{2\gamma} - \frac{L}{2} \right) r^t + \frac{\gamma}{2} s^t + \frac{\gamma}{\theta} \left( (1 - \theta) s^t + \beta \tilde{L}^2 r^t \right) \\ &= (1 - \gamma\mu) \delta^t + \frac{\gamma}{\theta} \left( 1 - \frac{\theta}{2} \right) s^t - \left( \frac{1}{2\gamma} - \frac{L}{2} - \frac{\beta \tilde{L}^2 \gamma}{\theta} \right) r^t. \end{aligned}$$

Note that our assumption on the stepsize implies that  $1 - \frac{\theta}{2} \leq 1 - \gamma\mu$  and  $\frac{1}{2\gamma} - \frac{L}{2} - \frac{\beta \tilde{L}^2 \gamma}{\theta} \geq 0$ . The last inequality follows from the bound  $\gamma^2 \frac{2\beta \tilde{L}^2}{\theta} + \gamma L \leq 1$ , which holds because of Lemma 5 and our assumption on the stepsize. Thus,

$$\delta^{t+1} + \frac{\gamma}{\theta} s^{t+1} \leq (1 - \gamma\mu) \left( \delta^t + \frac{\gamma}{\theta} s^t \right).$$

It remains to unroll the recurrence.  $\square$

## G EF21+: The Algorithm and its Analysis

### G.1 The EF21+ Algorithm

In this section we formally present the EF21+ algorithm (see Algorithm 4), and show that Theorems 2 and 3 still apply.

### G.2 Analysis of EF21+

It is easy to see that both Theorem 2 and Theorem 3 apply for EF21+ as well, under the additional assumption that  $\mathcal{C}$  is deterministic, such as Top- $k$ . Note that the properties of  $\mathcal{C}$  appear in the proofs only through Lemma 2, which in the language of Algorithm 4 says that

$$\mathbb{E} [M_i^{t+1} | W^t] \leq (1 - \theta) G_i^t + \beta \|\nabla f_i(x^{t+1}) - \nabla f_i(x^t)\|^2,$$

where  $G_i^t = \|g_i^t - \nabla f_i(x^t)\|^2$ . On the other hand, due to Step 8 in Algorithm 4, we know that

$$G_i^{t+1} \leq \min\{B_i^{t+1}, M_i^{t+1}\} \leq M_i^{t+1}.$$

Now, due to the assumption that  $\mathcal{C}$  is a deterministic compressor, we have  $\mathbb{E} [G_i^{t+1} | W^t] \leq G_i^{t+1}$ . By stringing these three inequalities together, we arrive at

$$\mathbb{E} [G_i^{t+1} | W^t] \leq (1 - \theta) G_i^t + \beta \|\nabla f_i(x^{t+1}) - \nabla f_i(x^t)\|^2,$$

and this inequality can be used in the proofs instead. The rest of the proof is identical.

---

**Algorithm 4** EF21+ (Multiple nodes)

---

1: **Input:** starting point  $x^0 \in \mathbb{R}^d$ ;  $g_i^0 = \mathcal{C}(\nabla f_i(x^0))$  for  $i = 1, \dots, n$  (known by nodes and the master); learning rate  $\gamma > 0$ ;  $g^0 = \frac{1}{n} \sum_{i=1}^n g_i^0$  (known by master)  
2: **for**  $t = 0, 1, 2, \dots, T - 1$  **do**  
3: Master computes  $x^{t+1} = x^t - \gamma g^t$  and broadcasts  $x^{t+1}$  to all nodes  
4: **for all nodes**  $i = 1, \dots, n$  **in parallel do**  
5: Compute gradient compressed by biased compressor  $b_i^{t+1} = \mathcal{C}(\nabla f_i(x^{t+1}))$   
6: Compute gradient compressed by Markov compressor  $m_i^{t+1} = g_i^t + \mathcal{C}(\nabla f_i(x^{t+1}) - g_i^t)$   
7: Compute distortions:  $B_i^{t+1} = \|b_i^{t+1} - \nabla f_i(x^{t+1})\|^2$ ;  $M_i^{t+1} = \|m_i^{t+1} - \nabla f_i(x^{t+1})\|^2$   
8: Set  $g_i^{t+1} = \begin{cases} m_i^{t+1} & \text{if } M_i^{t+1} \leq B_i^{t+1} \\ b_i^{t+1} & \text{if } M_i^{t+1} > B_i^{t+1} \end{cases}$   
9: **end for**  
10: Master computes  $g^{t+1} = \frac{1}{n} \sum_{i=1}^n g_i^{t+1}$   
11: **end for**

---

## H Dealing with Stochastic Gradients (Details for Section 4.7)

We now describe a natural extension of EF21 to the setting where full gradient computations are replaced by stochastic gradient estimators, i.e., we use a random vector

$$\hat{g}_i^t \approx \nabla f_i(x^t)$$

instead of  $\nabla f_i(x^t)$ . This simple change leads to Algorithm 5, where we **highlight in red** the parts that differ from the exact/full gradient version of EF21.

---

**Algorithm 5** EF21 (Multiple nodes + **Stochastic regime**)

---

1: **Input:** starting point  $x^0 \in \mathbb{R}^d$ ;  $g_i^0 = \mathcal{C}(\hat{g}_i^0)$ , where  $\hat{g}_i^0 \approx \nabla f_i(x^0)$  for  $i = 1, \dots, n$  (known by nodes and the master); learning rate  $\gamma > 0$ ;  $g^0 = \frac{1}{n} \sum_{i=1}^n g_i^0$  (known by master)  
2: **for**  $t = 0, 1, 2, \dots, T - 1$  **do**  
3: Master computes  $x^{t+1} = x^t - \gamma g^t$  and broadcasts  $x^{t+1}$  to all nodes  
4: **for all nodes**  $i = 1, \dots, n$  **in parallel do**  
5: **Compute a stochastic gradient**  $\hat{g}_i^{t+1} \approx \nabla f_i(x^{t+1})$   
6: Compress  $c_i^t = \mathcal{C}(\hat{g}_i^{t+1} - g_i^t)$  and send  $c_i^t$  to the master  
7: Update local state  $g_i^{t+1} = g_i^t + \mathcal{C}(\hat{g}_i^{t+1} - g_i^t)$   
8: **end for**  
9: Master computes  $g^{t+1} = \frac{1}{n} \sum_{i=1}^n g_i^{t+1}$  via  $g^{t+1} = g^t + \frac{1}{n} \sum_{i=1}^n c_i^t$   
10: **end for**

---

An analysis of this extension/generalization can be done in a similar manner. The key change is the replacement of Lemma 2 in the proofs of the two complexity theorems, and then accounting for this change in the proof. However, this is easy to do. We now describe what Lemma 2 should be replaced with.

We first start with a technical lemma.

**Lemma 6.** *Let  $\mathcal{C} \in \mathbb{B}(\alpha)$ , and let  $\xi \in \mathbb{R}^d$  be a random vector independent of  $\mathcal{C}$ , with zero mean and variance bounded as  $\mathbb{E}[\|\xi\|^2] \leq \sigma^2$ . Then for any  $s > 0$ , we have*

$$\mathbb{E}[\|\mathcal{C}(x + \xi) - x\|^2] \leq (1 - \alpha)(1 + s)\|x\|^2 + ((1 - \alpha)(1 + s) + 1 + s^{-1})\sigma^2, \quad \forall x \in \mathbb{R}^d.$$

*Proof.* First, due to Young's inequality, for any  $s > 0$  we have

$$\|\mathcal{C}(x + \xi) - x\|^2 \leq (1 + t)\|\mathcal{C}(x + \xi) - (x + \xi)\|^2 + (1 + s^{-1})\|\xi\|^2. \quad (34)$$

By taking conditional expectation, we get

$$\begin{aligned}
\mathbb{E} \left[ \|\mathcal{C}(x + \xi) - x\|^2 \mid \xi \right] &\stackrel{(34)}{\leq} (1+s)\mathbb{E} \left[ \|\mathcal{C}(x + \xi) - (x + \xi)\|^2 \mid \xi \right] + (1+s^{-1})\|\xi\|^2 \\
&\stackrel{(3)}{\leq} (1+s)(1-\alpha)\|x + \xi\|^2 + (1+s^{-1})\|\xi\|^2 \\
&= (1-\alpha)(1+s)\|x\|^2 + 2(1-\alpha)(1+s)\langle x, \xi \rangle \\
&\quad + ((1-\alpha)(1+s) + 1 + s^{-1})\|\xi\|^2. \tag{35}
\end{aligned}$$

Taking expectation again, applying the tower property, and using the fact that  $\mathbb{E}[\xi] = 0$  and  $\mathbb{E}[\|\xi\|^2] \leq \sigma^2$ , we finally get

$$\begin{aligned}
\mathbb{E} \left[ \|\mathcal{C}(x + \xi) - x\|^2 \right] &= \mathbb{E} \left[ \mathbb{E} \left[ \|\mathcal{C}(x + \xi) - x\|^2 \mid \xi \right] \right] \\
&\stackrel{(35)}{\leq} (1-\alpha)(1+s)\|x\|^2 + ((1-\alpha)(1+s) + 1 + s^{-1})\sigma^2.
\end{aligned}$$

□

We will choose  $s < \frac{\alpha}{1-\alpha}$ , so that  $1 - \hat{\alpha} \stackrel{\text{def}}{=} (1-\alpha)(1+s) < 1$ . The above lemma postulates that for  $\mathcal{C} \in \mathbb{B}(\alpha)$ , and under certain assumptions on the noise  $\xi$ , there exist constants  $\hat{\alpha} > 0$  and  $\hat{\sigma} > 0$  such that

$$\mathbb{E} \left[ \|\mathcal{C}(x + \xi) - x\|^2 \right] \leq (1 - \hat{\alpha})\|x\|^2 + \hat{\sigma}^2, \quad \forall x \in \mathbb{R}^d. \tag{36}$$

We will elevate this inequality into an assumption because the particular values for  $\hat{\alpha}$  and  $\hat{\sigma}$  given by the lemma will not be tight for every compressor  $\mathcal{C}$ , and we want to formulate our complexity results with as tight constants as possible.

**Assumption 3.** Let  $\mathcal{C} : \mathbb{R}^d \rightarrow \mathbb{R}^d$  be a (possibly randomized) mapping and let  $\xi \in \mathbb{R}^d$  be a random vector independent of  $\mathcal{C}$ . We assume that there exist constants  $\hat{\alpha} > 0$  and  $\hat{\sigma} > 0$  such that (36) holds for all  $x \in \mathbb{R}^d$ .

We now present an analogue of Lemma 2 in the stochastic regime.

**Lemma 7.** Consider Algorithm 5 and let the stochastic estimator  $\hat{g}_i^t$  be given by

$$\hat{g}_i^t = \nabla f_i(x^t) + \xi_i^t,$$

where  $\xi_i^t$  is a random vector. Assume that for  $\xi = \xi_i^t$ , inequality (36) holds<sup>8</sup>. Let  $G_i^t \stackrel{\text{def}}{=} \|g_i^t - \nabla f_i(x^t)\|^2$  and  $W^t \stackrel{\text{def}}{=} \{g_1^t, \dots, g_n^t, x^t, x^{t+1}\}$ . For any  $t > 0$  we have

$$\mathbb{E} \left[ G_i^{t+1} \mid W^t \right] \leq \underbrace{(1 - \hat{\alpha})(1+s)}_{1-\theta(s)} G_i^t + \underbrace{(1 - \hat{\alpha})(1+s^{-1})}_{\hat{\beta}(s)} \|\nabla f_i(x^{t+1}) - \nabla f_i(x^t)\|^2 + \hat{\sigma}^2. \tag{37}$$

*Proof.*

$$\begin{aligned}
\mathbb{E} \left[ G_i^{t+1} \mid W^t \right] &= \mathbb{E} \left[ \|g_i^{t+1} - \nabla f_i(x^{t+1})\|^2 \mid W^t \right] \\
&= \mathbb{E} \left[ \|g_i^t + \mathcal{C}(\nabla f_i(x^{t+1}) + \xi_i^{t+1} - g_i^t) - \nabla f_i(x^{t+1})\|^2 \mid W^t \right] \\
&\stackrel{(36)}{\leq} (1 - \hat{\alpha}) \|\nabla f_i(x^{t+1}) - g_i^t\|^2 + \hat{\sigma}^2 \\
&\leq (1 - \hat{\alpha})(1+s) \|\nabla f_i(x^t) - g_i^t\|^2 \\
&\quad + (1 - \hat{\alpha})(1+s^{-1}) \|\nabla f_i(x^{t+1}) - \nabla f_i(x^t)\|^2 + \hat{\sigma}^2.
\end{aligned}$$

□

It is straightforward to use this inequality in the proofs of Theorems 2 and 3 to establish complexity results for our stochastic variant of EF21.

<sup>8</sup>Recall that by Lemma 6, it holds if  $\xi = \xi_i^t$  is a zero mean vector with variance bounded by  $\sigma^2$ .

## I Computation of $\sqrt{\frac{\beta(s^*)}{\theta(s^*)}}$ for some Compressors

### I.1 From unbiased to biased compressors

We start by proving the simple and very well known result about the relationship between the classes  $\mathbb{U}(\omega)$  and  $\mathbb{B}(\alpha)$  we mentioned in Section 2.

**Lemma 8.** *If  $\mathcal{C} \in \mathbb{U}(\omega)$ , then  $\frac{1}{1+\omega}\mathcal{C} \in \mathbb{B}\left(\frac{1}{1+\omega}\right)$ .*

*Proof.* Fix  $x \in \mathbb{R}^d$ . Note that for  $\mathcal{C} \in \mathbb{U}(\omega)$  we have

$$\mathbb{E}[\mathcal{C}(x)] = x, \quad (38)$$

$$\mathbb{E}[\|\mathcal{C}(x)\|^2] \leq (1+\omega)\|x\|^2. \quad (39)$$

Then

$$\begin{aligned} \mathbb{E}\left[\left\|\frac{1}{1+\omega}\mathcal{C}(x) - x\right\|^2\right] &= \frac{1}{(1+\omega)^2}\mathbb{E}[\|\mathcal{C}(x)\|^2] - \frac{2}{1+\omega}\mathbb{E}[\langle\mathcal{C}(x), x\rangle] + \|x\|^2 \\ &\stackrel{(38)}{\leq} \frac{1}{(1+\omega)^2}\|x\|^2 + \frac{\omega-1}{\omega+1}\|x\|^2 \\ &\stackrel{(39)}{\leq} \frac{1}{(1+\omega)}\|x\|^2 + \frac{\omega-1}{\omega+1}\|x\|^2 \\ &= \frac{\omega}{1+\omega}\|x\|^2 \\ &= \left(1 - \frac{1}{1+\omega}\right)\|x\|^2. \end{aligned}$$

□

### I.2 Top- $k$ and a scaled version of Rand- $k$

We now compute the value  $\sqrt{\frac{\beta(s^*)}{\theta(s^*)}}$  appearing in pour complexity theorems for two well known compressors belonging to the class  $\mathbb{B}(\alpha)$ .

**Example 1.** *Let  $\mathcal{C}$  be the Top- $k$  compressor. Then  $\mathcal{C} \in \mathbb{B}(\alpha)$  with  $\alpha = \frac{k}{d}$  and*

$$\sqrt{\frac{\beta(s^*)}{\theta(s^*)}} = \frac{\sqrt{1-k/d}}{1-\sqrt{1-k/d}}.$$

*Proof.* It is well known that  $\mathcal{C} \in \mathbb{B}(\alpha)$  with  $\alpha = \frac{k}{d}$  (e.g., see [Beznosikov et al., 2020]). Then according to Lemma 3, we have

$$\sqrt{\frac{\beta(s^*)}{\theta(s^*)}} = \frac{\sqrt{1-\alpha}}{1-\sqrt{1-\alpha}} = \frac{\sqrt{1-k/d}}{1-\sqrt{1-k/d}}.$$

□

**Example 2.** *Let  $\mathcal{C} = \left(\frac{1}{1+\omega}\right)\mathcal{C}'$ , where  $\mathcal{C}'$  is the Rand- $k$  compressor. Then  $\mathcal{C} \in \mathbb{B}(\alpha)$  with  $\alpha = \frac{k}{d}$  and*

$$\sqrt{\frac{\beta(s^*)}{\theta(s^*)}} = \frac{\sqrt{1-k/d}}{1-\sqrt{1-k/d}}.$$

*Proof.* It is well known that  $\mathcal{C}' \in \mathbb{B}(\omega)$  with  $\omega = \frac{d}{k} - 1$  (e.g., see [Beznosikov et al., 2020]). Moreover, using the Lemma 8, we get  $\left(\frac{1}{1+\omega}\right)\mathcal{C}' \in \mathbb{B}\left(\frac{k}{d}\right)$ . Finally, according to Lemma 3, we have

$$\sqrt{\frac{\beta(s^*)}{\theta(s^*)}} = \frac{\sqrt{1-\alpha}}{1-\sqrt{1-\alpha}} = \frac{\sqrt{1-k/d}}{1-\sqrt{1-k/d}}.$$

□
